# Supplementary material for: A Contracted DNA Repeat in LHX3 Intron 5 Is Associated with Aberrant Splicing and Pituitary Dwarfism in German Shepherd Dogs
Source: PubMed Central journal article supplement (PMC3223203; doi:10.1371/journal.pone.0027940), 2011-11-23
Supplement: pone.0027940.s001.pdf [file pone.0027940.s001.pdf]

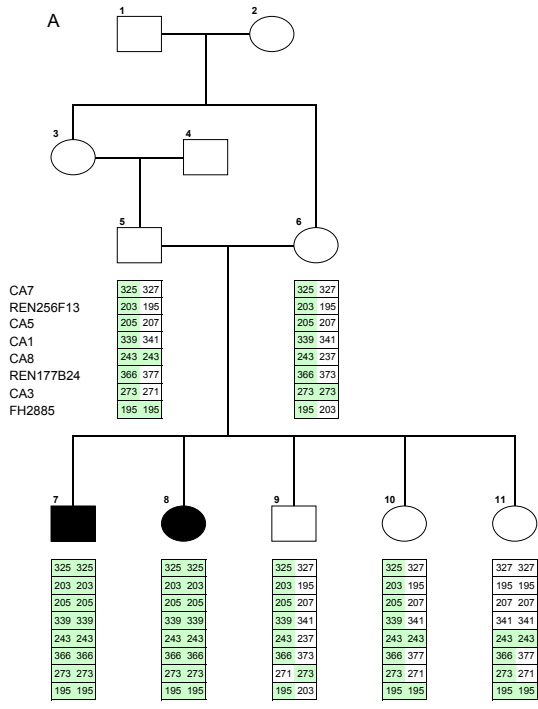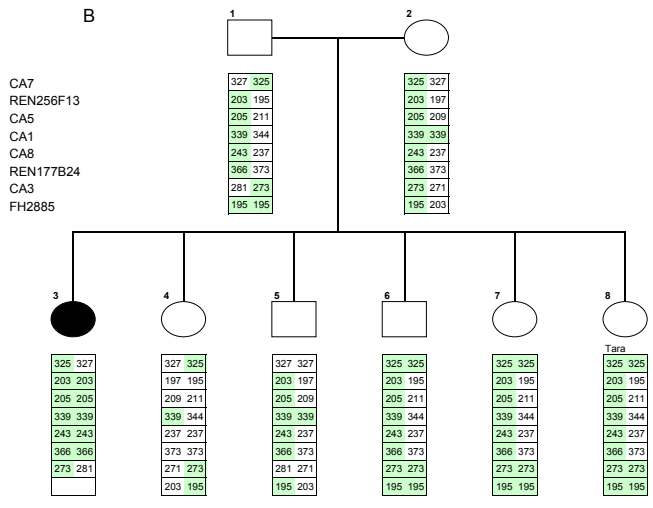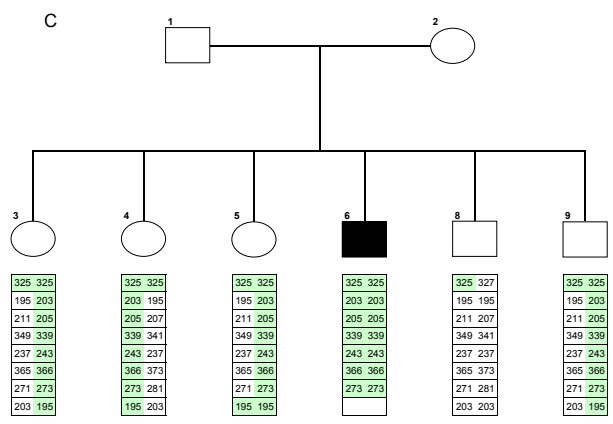

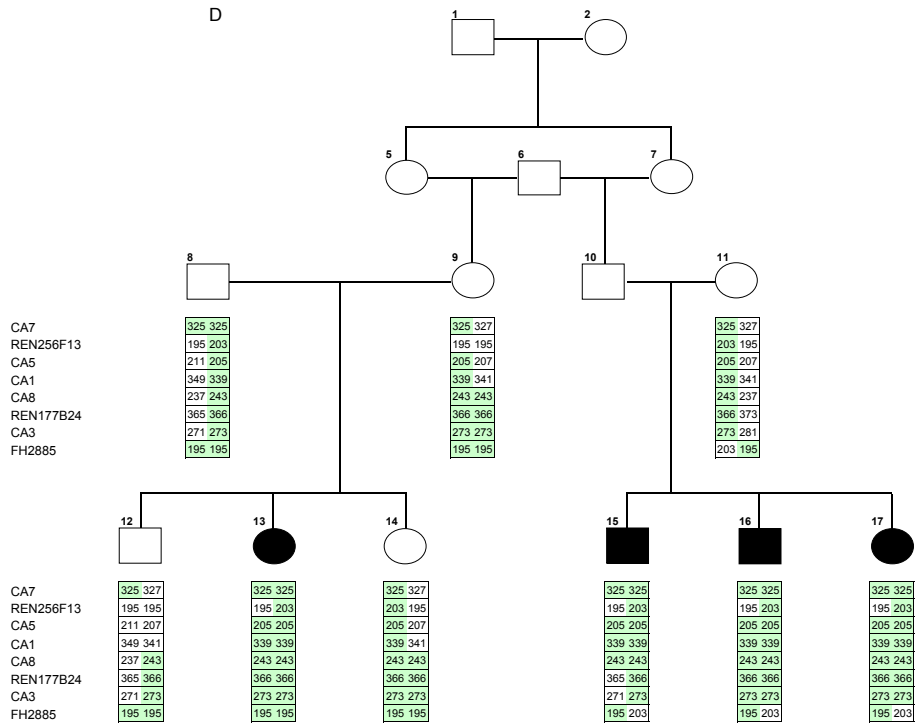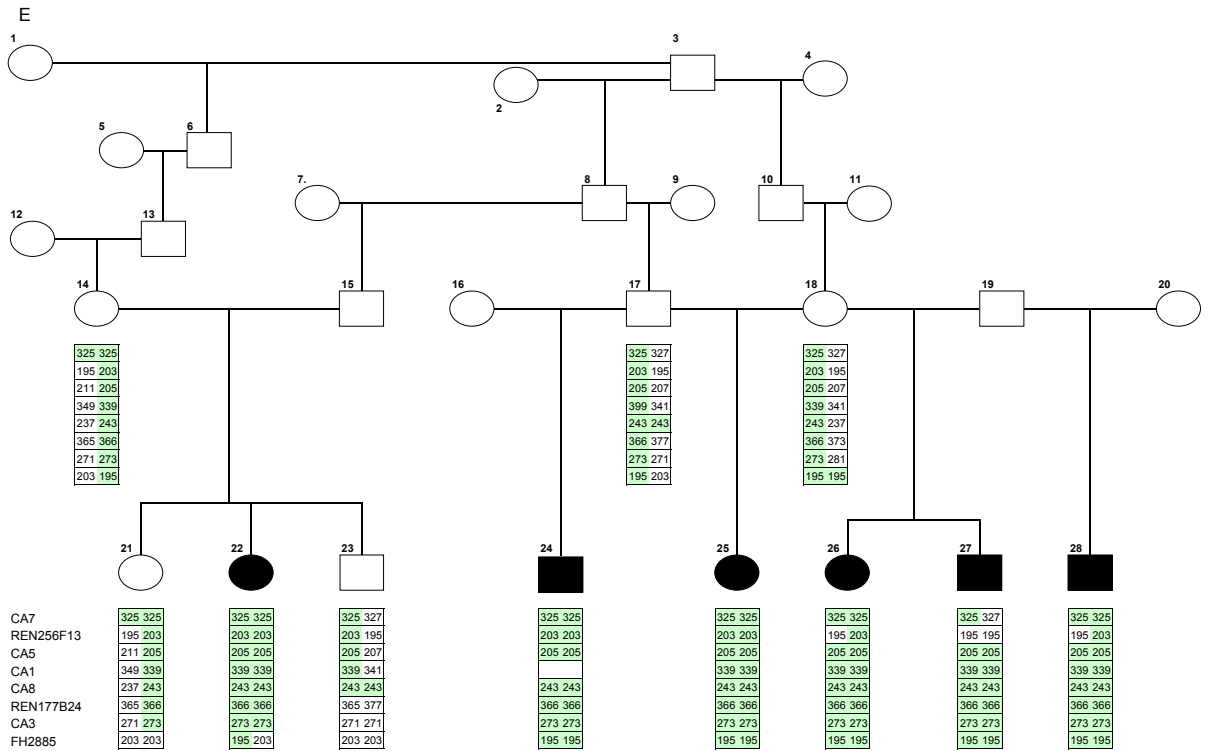

F

|           | 1       | 2       | 3       | 4       | 5       | 6       | 7       | 8       | 9       |
|-----------|---------|---------|---------|---------|---------|---------|---------|---------|---------|
| CA7       | 325 325 | 325 325 | 325 325 | 325 325 | 325 325 | 333 333 | 325 325 | 325 325 | 325 327 |
| REN256F13 | 203 203 | 203 203 | 203 203 | 203 203 | 203 203 | 203 203 | 203 203 | 203 203 | 203 195 |
| CA5       | 205 205 | 205 205 | 205 205 | 205 205 | 205 205 | 205 205 | 205 205 | 205 205 | 205 205 |
| CA1       | 339 339 | 339 339 | 339 339 | 339 339 | 339 339 | 339 339 | 339 339 | 339 339 | 339 339 |
| CA8       | 243 243 | 243 243 | 243 243 | 243 243 | 243 243 | 243 243 | 243 243 | 243 243 | 243 243 |
| REN177B24 | 366 366 | 366 366 | 366 366 | 366 377 | 366 366 | 366 366 | 366 366 | 366 366 | 366 373 |
| CA3       | 273 273 | 273 273 | 273 273 | 273 271 | 273 273 | 273 273 | 273 281 | 273 281 | 273 281 |
| FH2885    | 195 195 | 195 203 | 195 195 | 195 197 | 195 195 | 203 203 |         |         |         |
