# Supplementary material for: A Contracted DNA Repeat in LHX3 Intron 5 Is Associated with Aberrant Splicing and Pituitary Dwarfism in German Shepherd Dogs
Source: PLoS One. 2011 Nov 23;6(11):e27940. doi: 10.1371/journal.pone.0027940 (PMC3223203; doi:10.1371/journal.pone.0027940)
Supplement: Table S2 — Birth year, sex and origin of German shepherd dogs included in the study of pituitary dwarfism. (XLS) [file pone.0027940.s004.xls]

## Sheet: Blad1
Table S2. Birth year, sex and origin of German shepherd dogs included in the study of pituitary dwarfism.
	ID	AFFECTED Y/N	BIRTH YEAR	SEX M/F	COUNTRY
	A5	N	2002	M	USA
	A6	N	2000	F	USA
	A7	Y	2005	M	USA
	A8	Y	2005	F	USA
	A9	N	2005	M	USA
	A10	N	2005	F	USA
	A11	N	2005	F	USA
	B1	N	1998	M	BEL
	B2	N	2000	F	BEL
	B3	Y	2004	F	BEL
	B4	N	2004	F	BEL
	B5	N	2004	M	BEL
	B6	N	2004	M	BEL
	B7	N	2004	F	BEL
	B8	N	2004	F	BEL
	C3	N	2001	F	NLD
	C4	N	2001	F	NLD
	C5	N	2001	F	NLD
	C6	Y	2001	M	NLD
	C8	N	2001	M	NLD
	C9	N	2001	M	NLD
	D8	N	1990	M	NLD
	D9	N	1994	F	NLD
	D11	N	1996	F	NLD
	D12	N	1996	M	NLD
	D13	Y	1996	F	NLD
	D14	N	1996	F	NLD
	D15	Y	1998	M	NLD
	D16	Y	1998	M	NLD
	D17	Y	1998	F	NLD
	E14	N	1994	F	NLD
	E17	N	1993	M	NLD
	E18	N	1992	F	NLD
	E21	N	1997	F	NLD
	E22	Y	1997	F	NLD
	E23	N	1997	M	NLD
	E24	Y	1999	M	NLD
	E25	Y	1996	F	NLD
	E26	Y	1998	F	NLD
	E27	Y	1998	M	NLD
	E28	Y	1998	M	NLD
	F1	Y	1995	F	NLD
	F2	Y	1998	F	NLD
	F3	Y	1998	F	NLD
	F4	Y	1999	F	NLD
	F5	Y	2000	M	NLD
	F6	Y	1999	M	NLD
	F7	Y	2005	M	ESP
	F8	Y	2000	M	NLD
	F9	Y	1993	F	ESP
